# Supplementary material
Source: HighWire-hosted journal article supplement (https://cmajopen-stage.highwire.org/highwire/filestream/84444/field_highwire_adjunct_files/1/2020-0031-original-submission.pdf)
Supplement: 2020-0031-original-submission.pdf [file 2020-0031-original-submission.pdf]

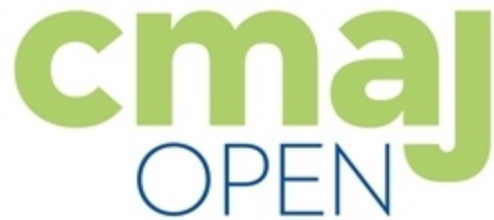

**A Pre-Test Post-Test Study to Assess the Readiness to Manage Intimate Partner Violence within the Fracture Clinic 12 Months Following Completion of an Educational Program**

|                               |                                                                                                                                                                                                                                                                                                                                                                                                                                                                                                                                                                                                                                                                                                                                                                                                                                                                                                                                                                                                                                                                               |
|-------------------------------|-------------------------------------------------------------------------------------------------------------------------------------------------------------------------------------------------------------------------------------------------------------------------------------------------------------------------------------------------------------------------------------------------------------------------------------------------------------------------------------------------------------------------------------------------------------------------------------------------------------------------------------------------------------------------------------------------------------------------------------------------------------------------------------------------------------------------------------------------------------------------------------------------------------------------------------------------------------------------------------------------------------------------------------------------------------------------------|
| Journal:                      | <i>CMAJ Open</i>                                                                                                                                                                                                                                                                                                                                                                                                                                                                                                                                                                                                                                                                                                                                                                                                                                                                                                                                                                                                                                                              |
| Manuscript ID                 | CMAJOpen-2020-0031                                                                                                                                                                                                                                                                                                                                                                                                                                                                                                                                                                                                                                                                                                                                                                                                                                                                                                                                                                                                                                                            |
| Manuscript Type:              | Before and After                                                                                                                                                                                                                                                                                                                                                                                                                                                                                                                                                                                                                                                                                                                                                                                                                                                                                                                                                                                                                                                              |
| Date Submitted by the Author: | 24-Feb-2020                                                                                                                                                                                                                                                                                                                                                                                                                                                                                                                                                                                                                                                                                                                                                                                                                                                                                                                                                                                                                                                                   |
| Complete List of Authors:     | Guyatt, Paige; McMaster University<br>Sprague, Sheila; McMaster University, Surgery; McMaster University, Health, Evidence & Impact<br>Scott, Taryn; McMaster University, Clinical Epidemiology & Biostatistics<br>Heels-Ansdell, Diane; McMaster University, Biostatistics and Epidemiology<br>McKay, Paula; McMaster University, Department of Surgery<br>Tikasz, Diana; Hamilton Health Sciences, Domestic Violence Sexual Assault Care Centre<br>Schneider, Prism; University of Calgary Cumming School of Medicine, Surgery<br>Schemitsch, Emil; London Health Sciences Centre; Western University<br>Sietsema, Deborah; The CORE Institute<br>Bhandari, Mohit                                                                                                                                                                                                                                                                                                                                                                                                           |
| More Detailed Keywords:       | Intimate Partner Violence, EDUCATE, IPV, Educational Program, Pre-test Post-test, Fracture Clinic                                                                                                                                                                                                                                                                                                                                                                                                                                                                                                                                                                                                                                                                                                                                                                                                                                                                                                                                                                             |
| Keywords:                     | Orthopedic surgery, Clinical Practice Guidelines, Medical education                                                                                                                                                                                                                                                                                                                                                                                                                                                                                                                                                                                                                                                                                                                                                                                                                                                                                                                                                                                                           |
| Abstract:                     | <p><b>ABSTRACT</b></p> <p><b>Background:</b> We developed an intimate partner violence (IPV) educational program with the overarching goal of improving the preparedness of health care providers' (HCPs) to help patients who are victims of IPV. Our previously published study found significant improvements in HCPs' readiness to manage IPV at 3 months following completion of the educational training. This study sought to determine if similar improvements were observed at 12-months post-training.</p> <p><b>Methods:</b> We enrolled 140 participating HCPs from 7 fracture clinics in Canada and the United States and administered the Physician Readiness to Manage IPV Survey (PREMIS) before participants completed the educational program (baseline), immediately after training, and at 3months and 12 months post-training. In this study, we compared mean 12 month scores to mean baseline scores for each of the PREMIS subscales using linear regression models.</p> <p><b>Results:</b> We found statistically significant improvements among</p> |

1  
2  
3  
4  
5  
6  
7  
8  
9  
10  
11  
12  
13  
14  
15  
16  
17  
18  
19  
20  
21  
22  
23  
24  
25  
26  
27  
28  
29  
30  
31  
32  
33  
34  
35  
36  
37  
38  
39  
40  
41  
42  
43  
44  
45  
46  
47  
48  
49  
50  
51  
52  
53  
54  
55  
56  
57  
58  
59  
60

|  |                                                                                                                                                                                                                                                                                                                                                                                                                                                                                                                                                                                                                                                                                                  |
|--|--------------------------------------------------------------------------------------------------------------------------------------------------------------------------------------------------------------------------------------------------------------------------------------------------------------------------------------------------------------------------------------------------------------------------------------------------------------------------------------------------------------------------------------------------------------------------------------------------------------------------------------------------------------------------------------------------|
|  | <p>participating HCPs’ actual knowledge about IPV 12 months after training. Statistically significant improvements from baseline to 12 months were also observed for 7 of the 9 other subscales of the PREMIS. These subscales included perceived preparation, perceived knowledge, preparation, legal requirements, workplace issues, self-efficacy, and practice issues.</p> <p>Interpretation: The EDUCATE program led to significant improvements in HCPs’ readiness to manage IPV, with positive changes being observed 12 months after training occurred. These findings indicate that HCPs who receive this training are better equipped to manage patients who have experienced IPV.</p> |
|  |                                                                                                                                                                                                                                                                                                                                                                                                                                                                                                                                                                                                                                                                                                  |

SCHOLARONE™  
Manuscripts

## STROBE Statement—checklist of items that should be included in reports of observational studies

|                              | Item No | Recommendation                                                                                                                                                                                                                                                                                                                                                                                                                                                         | Page No    |
|------------------------------|---------|------------------------------------------------------------------------------------------------------------------------------------------------------------------------------------------------------------------------------------------------------------------------------------------------------------------------------------------------------------------------------------------------------------------------------------------------------------------------|------------|
| <b>Title and abstract</b>    | 1       | (a) Indicate the study's design with a commonly used term in the title or the abstract                                                                                                                                                                                                                                                                                                                                                                                 | Title Page |
|                              |         | (b) Provide in the abstract an informative and balanced summary of what was done and what was found                                                                                                                                                                                                                                                                                                                                                                    | 3          |
| <b>Introduction</b>          |         |                                                                                                                                                                                                                                                                                                                                                                                                                                                                        |            |
| Background/rationale         | 2       | Explain the scientific background and rationale for the investigation being reported                                                                                                                                                                                                                                                                                                                                                                                   | 4          |
| Objectives                   | 3       | State specific objectives, including any prespecified hypotheses                                                                                                                                                                                                                                                                                                                                                                                                       | 4          |
| <b>Methods</b>               |         |                                                                                                                                                                                                                                                                                                                                                                                                                                                                        |            |
| Study design                 | 4       | Present key elements of study design early in the paper                                                                                                                                                                                                                                                                                                                                                                                                                | 5          |
| Setting                      | 5       | Describe the setting, locations, and relevant dates, including periods of recruitment, exposure, follow-up, and data collection                                                                                                                                                                                                                                                                                                                                        | 5          |
| Participants                 | 6       | (a) <i>Cohort study</i> —Give the eligibility criteria, and the sources and methods of selection of participants. Describe methods of follow-up<br><i>Case-control study</i> —Give the eligibility criteria, and the sources and methods of case ascertainment and control selection. Give the rationale for the choice of cases and controls<br><i>Cross-sectional study</i> —Give the eligibility criteria, and the sources and methods of selection of participants | 5          |
|                              |         | (b) <i>Cohort study</i> —For matched studies, give matching criteria and number of exposed and unexposed<br><i>Case-control study</i> —For matched studies, give matching criteria and the number of controls per case                                                                                                                                                                                                                                                 |            |
| Variables                    | 7       | Clearly define all outcomes, exposures, predictors, potential confounders, and effect modifiers. Give diagnostic criteria, if applicable                                                                                                                                                                                                                                                                                                                               | 5          |
| Data sources/<br>measurement | 8*      | For each variable of interest, give sources of data and details of methods of assessment (measurement). Describe comparability of assessment methods if there is more than one group                                                                                                                                                                                                                                                                                   | 5          |
| Bias                         | 9       | Describe any efforts to address potential sources of bias                                                                                                                                                                                                                                                                                                                                                                                                              | 5-7        |
| Study size                   | 10      | Explain how the study size was arrived at                                                                                                                                                                                                                                                                                                                                                                                                                              | 5          |
| Quantitative variables       | 11      | Explain how quantitative variables were handled in the analyses. If applicable, describe which groupings were chosen and why                                                                                                                                                                                                                                                                                                                                           | 5          |
| Statistical methods          | 12      | (a) Describe all statistical methods, including those used to control for confounding                                                                                                                                                                                                                                                                                                                                                                                  | 5          |
|                              |         | (b) Describe any methods used to examine subgroups and interactions                                                                                                                                                                                                                                                                                                                                                                                                    | 5          |
|                              |         | (c) Explain how missing data were addressed                                                                                                                                                                                                                                                                                                                                                                                                                            | 5          |
|                              |         | (d) <i>Cohort study</i> —If applicable, explain how loss to follow-up was addressed<br><i>Case-control study</i> —If applicable, explain how matching of cases and controls was addressed<br><i>Cross-sectional study</i> —If applicable, describe analytical methods taking account of sampling strategy                                                                                                                                                              | 5          |
|                              |         | (e) Describe any sensitivity analyses                                                                                                                                                                                                                                                                                                                                                                                                                                  | 5          |

Continued on next page

1  
2  
3  
4  
5  
6  
7  
8  
9  
10  
11  
12  
13  
14  
15  
16  
17  
18  
19  
20  
21  
22  
23  
24  
25  
26  
27  
28  
29  
30  
31  
32  
33  
34  
35  
36  
37  
38  
39  
40  
41  
42  
43  
44  
45  
46  
47  
48  
49  
50  
51  
52  
53  
54  
55  
56  
57  
58  
59  
60**Results**

|                  |     |                                                                                                                                                                                                              |                 |
|------------------|-----|--------------------------------------------------------------------------------------------------------------------------------------------------------------------------------------------------------------|-----------------|
| Participants     | 13* | (a) Report numbers of individuals at each stage of study—eg numbers potentially eligible, examined for eligibility, confirmed eligible, included in the study, completing follow-up, and analysed            | 6               |
|                  |     | (b) Give reasons for non-participation at each stage                                                                                                                                                         | 6-8             |
|                  |     | (c) Consider use of a flow diagram                                                                                                                                                                           | N/A             |
| Descriptive data | 14* | (a) Give characteristics of study participants (eg demographic, clinical, social) and information on exposures and potential confounders                                                                     | Table 1         |
|                  |     | (b) Indicate number of participants with missing data for each variable of interest                                                                                                                          | N/A             |
|                  |     | (c) <i>Cohort study</i> —Summarise follow-up time (eg, average and total amount)                                                                                                                             |                 |
| Outcome data     | 15* | <i>Cohort study</i> —Report numbers of outcome events or summary measures over time                                                                                                                          | Page 6, Table 2 |
|                  |     | <i>Case-control study</i> —Report numbers in each exposure category, or summary measures of exposure                                                                                                         |                 |
|                  |     | <i>Cross-sectional study</i> —Report numbers of outcome events or summary measures                                                                                                                           |                 |
| Main results     | 16  | (a) Give unadjusted estimates and, if applicable, confounder-adjusted estimates and their precision (eg, 95% confidence interval). Make clear which confounders were adjusted for and why they were included | Table 2         |
|                  |     | (b) Report category boundaries when continuous variables were categorized                                                                                                                                    | Table 2         |
|                  |     | (c) If relevant, consider translating estimates of relative risk into absolute risk for a meaningful time period                                                                                             | N/A             |
| Other analyses   | 17  | Report other analyses done—eg analyses of subgroups and interactions, and sensitivity analyses                                                                                                               | N/A             |

**Discussion**

|                  |    |                                                                                                                                                                            |     |
|------------------|----|----------------------------------------------------------------------------------------------------------------------------------------------------------------------------|-----|
| Key results      | 18 | Summarise key results with reference to study objectives                                                                                                                   | 6   |
| Limitations      | 19 | Discuss limitations of the study, taking into account sources of potential bias or imprecision. Discuss both direction and magnitude of any potential bias                 | 6-7 |
| Interpretation   | 20 | Give a cautious overall interpretation of results considering objectives, limitations, multiplicity of analyses, results from similar studies, and other relevant evidence | 6-7 |
| Generalisability | 21 | Discuss the generalisability (external validity) of the study results                                                                                                      | 7   |

**Other information**

|         |    |                                                                                                                                                               |            |
|---------|----|---------------------------------------------------------------------------------------------------------------------------------------------------------------|------------|
| Funding | 22 | Give the source of funding and the role of the funders for the present study and, if applicable, for the original study on which the present article is based | Title Page |
|---------|----|---------------------------------------------------------------------------------------------------------------------------------------------------------------|------------|

\*Give information separately for cases and controls in case-control studies and, if applicable, for exposed and unexposed groups in cohort and cross-sectional studies.

**Note:** An Explanation and Elaboration article discusses each checklist item and gives methodological background and published examples of transparent reporting. The STROBE checklist is best used in conjunction with this article (freely available on the Web sites of PLoS Medicine at <http://www.plosmedicine.org/>, Annals of Internal Medicine at <http://www.annals.org/>, and Epidemiology at <http://www.epidem.com/>). Information on the STROBE Initiative is available at [www.strobe-statement.org](http://www.strobe-statement.org).

**A Pre-Test Post-Test Study to Assess the Readiness to Manage Intimate Partner Violence  
within the Fracture Clinic 12 Months Following Completion of an Educational Program**

The EDUCATE Investigators\*

**Word Count: 1318**

**Number of Tables: 2**

Sheila Sprague, PhD (corresponding author)  
Department of Surgery  
Department of Health Research Methods, Evidence, and Impact  
McMaster University  
293 Wellington St. N., Suite 110  
Hamilton, ON, L8L 8E7  
905.527.4322 ext. 44490  
sprags@mcmaster.ca

\*The EDUCATE Investigators

Writing committee: Paige Guyatt<sup>1</sup> BSc (Cand.) (Co-Chair), Sheila Sprague<sup>1,2</sup> PhD (Co-Chair), Taryn Scott<sup>1</sup> MSW MSc, Diane Heels-Ansdell<sup>2</sup> MSc, Paula McKay<sup>1</sup> BSc, Diana Tikasz<sup>3</sup> MSW, RSW, Prism S. Schneider<sup>4</sup> MD PhD, Emil H. Schemitsch<sup>5,6</sup> MD, Deborah L. Sietsema<sup>7</sup> PhD, Mohit Bhandari<sup>1,2</sup> MD PhD.

Study design and coordination: Sheila Sprague PhD, Taryn Scott MSW, Diana Tikasz MSW RSW, Paula McKay BSc, Lehana Thabane PhD, Diane Heels-Ansdell MSc, Patricia Solomon PhD, Deborah J. Cook MD MSc, Gerard P. Slobogean MD MPH, Patricia Schneider BSc;

Participating sites: Prism S. Schneider MD PhD, Richard E. Buckley MD, Leah Kennedy BScN RN, Tanja Harrison MPA, Brad A. Petrisor MD MSc, Andrew Furey MD MSc, Kayla Cyr MD, Erin Baker MSc, Jeremy A. Hall MD MEd, Aaron Nauth MD MSc, Milena Vicente BScN RN, Debra L. Sietsema PhD, Emil H. Schemitsch MD, Melanie MacNevin BSc, Anthony Adili MD;

Knowledge users: Douglas Thomson BSc, Trinity Wittman MSc, Mohit Bhandari MD PhD, Gina Agarwal MBBS PhD, Vanina Dal Bello-Haas PhD PT, Samir Faidi MD, Norma MacIntyre PhD, Angela Reitsma MSc RM, Andrew Worster MD MSc, Aparna Swaminathan BCh BAO, Ari Collerman MN, Nneka MacGregor LLB, Sarah Resendes Gilbert MPH

1. Department of Surgery, McMaster University, 293 Wellington St. N., Suite 110, Hamilton, ON, L8L 8E7
2. Department of Health Research Methods, Evidence, and Impact, McMaster University, 293 Wellington St. N., Suite 110, Hamilton, ON, L8L 8E7

3. Sexual Assault/Domestic Violence Care Centre, Hamilton Health Sciences, McMaster University Medical Centre, 1200 Main Street West, Room 4B24, Hamilton, ON, L8N 3Z5
4. Department of Surgery, University of Calgary, 3134 Hospital Drive NW, Calgary, AB, T2N 5A1
5. Department of Orthopaedics, London Health Sciences Centre, London, ON, N6A 5A5
6. University of Western Ontario, 339 Windermere Rd, London, ON, N6A 3K7
7. The CORE Institute, 18444 N. 25<sup>th</sup> Ave., Suite 320, Phoenix, AZ, 85023

### **Disclaimers**

The contents of this article and the views expressed are solely the author's and are not the official position of affiliated institutions or funding agencies.

### **Funding Statement/Sources of Support**

The study was funded by research grants from the Canadian Institutes of Health Research (KAL – 147545) and the Hamilton Academic Health Sciences Organization. MB was also funded, in part, by a Canada Research Chair in musculoskeletal trauma, which is unrelated to the present study (McMaster University, Hamilton, ON, Canada). The funder of the study had no role in its design, data collection, data analysis, data interpretation, or writing of the report. The corresponding author had full access to all data in the study and had final responsibility for the decision to submit for publication.

## ABSTRACT

*Background:* We developed an intimate partner violence (IPV) educational program with the overarching goal of improving the preparedness of health care providers' (HCPs) to help patients who are victims of IPV. Our previously published study found significant improvements in HCPs' readiness to manage IPV at 3 months following completion of the educational training. This study sought to determine if similar improvements were observed at 12-months post-training.

*Methods:* We enrolled 140 participating HCPs from 7 fracture clinics in Canada and the United States and administered the Physician Readiness to Manage IPV Survey (PREMIS) before participants completed the educational program (baseline), immediately after training, and at 3months and 12 months post-training. In this study, we compared mean 12 month scores to mean baseline scores for each of the PREMIS subscales using linear regression models.

*Results:* We found statistically significant improvements among participating HCPs' actual knowledge about IPV 12 months after training. Statistically significant improvements from baseline to 12 months were also observed for 7 of the 9 other subscales of the PREMIS. These subscales included perceived preparation, perceived knowledge, preparation, legal requirements, workplace issues, self-efficacy, and practice issues.

*Interpretation:* The EDUCATE program led to significant improvements in HCPs' readiness to manage IPV, with positive changes being observed 12 months after training occurred. These findings indicate that HCPs who receive this training are better equipped to manage patients who have experienced IPV.

## INTRODUCTION

Intimate partner violence (IPV) is defined by the World Health Organization as, “any behaviour within an intimate relationship that causes physical, psychological or sexual harm to those in the relationship” [1]. IPV can include acts of physical violence, sexual violence, emotional or psychological abuse, controlling behaviours, and stalking [10,11]. Previous research has shown that although there is a high prevalence of IPV among female patients visiting fracture clinics [2], health care providers (HCPs) working in fracture clinics often do not feel prepared to talk to potential victims about IPV [3,4,5].

To combat this lack of preparedness among HCPs working with fracture patients, an educational program, EDUCATE, was implemented at fracture clinic sites across Canada and the United States, and a study of the same name was conducted to determine the long-term impact of this educational program. The aim of the EDUCATE study was to determine if the educational program was successful in increasing HCPs knowledge about IPV and preparedness to discuss IPV with their patients, as assessed by the Physician Readiness to Manage IPV Survey (PREMIS) [6]. Our primary outcome was change in score on the survey for the actual knowledge subscale from before training to 3 months after training. Results from the 3-month evaluations were presented in a 2018 publication, which found significant improvement on the actual knowledge subscale 3 months after the training (mean difference [MD] 2.44, 95% confidence interval [CI] 1.79 to 3.09). Additionally, there were statistically significant improvements on 7 additional subscales 3 months after training [7].

Educational research suggests that in comparison to short-term knowledge retention, long-term retention is a more accurate indicator of actual learning [8]. Therefore, a secondary objective of this study was to determine if improvements in knowledge were maintained at 12 months following completion of the EDUCATE training. The objective of this paper is to present the long-term (12 month) follow-up data from the EDUCATE study.



## METHODS

### Program and Study Overview

A description of the EDUCATE program and study methodology have been previously published [7]. Briefly, we enrolled 140 participants (orthopedic surgeons, surgical trainees, non-physician HCPs and research and administrative staff) from 7 fracture clinics in North America who completed the 2-hour educational program. We used a pretest–posttest study design to assess knowledge, attitudes, beliefs and self-reported behaviours. We administered the PREMIS tool before, immediately after and at 3 months and 12 months after training and generated scores for each of the 10 PREMIS subscales. These subscales include: (a) perceived preparation to manage IPV, (b) perceived knowledge of important IPV issues, (c) actual knowledge, (d) preparation, (e) legal requirements, (f) workplace issues, (g) self-efficacy, (h) alcohol/drugs, (i) victim understanding, and (j) practice issues. The subscales were all used to determine the effectiveness of IPV training programs by assessing HCPs level of preparedness to assist patients who are experiencing IPV.

### Statistical Analysis

Although no minimal clinically important difference (MCID) has been determined for the PREMIS, the MCID was estimated using half the standard deviation (SD). We chose to base our sample size upon this approximation because it has been found in previous research that half the SD is a reliable substitute for health-related quality of life measures [9]. We scored each PREMIS subscale based on the algorithm published by the developer. The changes in scores of all subscales from the PREMIS were entered as the dependent variable into multivariable linear regression models. Baseline score, age, sex, profession (orthopaedic surgeon vs student/resident/fellow vs allied health care professional vs research personnel), and previous IPV training (none vs any) were included as independent variables. A mean difference, reflecting the scores of all participants who completed the survey at baseline and 12 months after training, was calculated and presented with a 95% confidence interval (CI). The results of a pair *t*-test analysis were used to perform a sensitivity analysis for all outcomes; we present the mean scores from each subscale completed at baseline and 12 months after training. All tests conducted were 2-tailed and used an  $\alpha$  level of 0.05. We did not adjust the overall level of significance for multiple testing since all analyses are exploratory. We used SAS software, version 9.4, to conduct all analyses.

## RESULTS

Of the 140 HCPs who consented to participate in the EDUCATE training and corresponding study, 109 (79%) completed the 12-month follow-up PREMIS. The mean age of the participants was 36.7 (10.9) years and 67% of participants were male (**Table 1**). Almost two-thirds of participants were either orthopaedic surgeons (23.9%) or orthopaedic surgery residents (41.3%).

We found statistically significant improvements in participating HCPs' actual knowledge about IPV subscale 12 months after training (mean difference [MD] 2.50, 95% confidence interval [CI] 1.40 to 3.61). We also found statistically significant improvements at 12 months post-training in 7 of the 9 other subscales of the PREMIS as compared to baseline. These subscales included perceived preparation (MD 2.06, 95% CI 1.83 to 2.29), perceived knowledge (MD 2.14, 95% CI 1.91 to 2.36), preparation (MD 1.10, 95% CI 0.82 to 1.38), legal requirements (MD 1.57, 95% CI 1.27 to 1.87), workplace issues (MD 1.20, 95% CI 1.01 to 1.39), self-efficacy (MD 0.56, 95% CI 0.44 to 0.69), and practice issues (MD 6.12, 95% CI 4.85 to 7.40). We did not find statistically significant improvements in the drugs and alcohol and victim understanding subscales. Our sensitivity analysis, using paired t-tests, mirrored the above findings.

## INTERPRETATIONS

The statistically significant improvements in HCPs' knowledge, attitudes, and behaviours related to IPV that were observed 3 months following completion of the EDUCATE training program were also observed 12 months after training. These findings suggest that HCPs working in fracture clinics who complete the EDUCATE program feel more prepared to identify and support women who visit their clinic having experienced IPV than before receiving training; moreover, these benefits prevail in the long-term. For 7 of the 10 PREMIS subscales (actual knowledge, perceived preparation, perceived knowledge, practice issues, preparation, legal requirements, workplace issues, self-efficacy), the improvement from baseline (as illustrated by the mean difference in scores) was greater at 12 months post-training than at 3 months post-training. The improvement in the alcohol/drugs subscale seen at 3 months was not present at 12 months.

Strengths and limitations to the overall EDUCATE program and corresponding study have been previously published [7]. Briefly, although an experimental design would produce higher quality

1  
2  
3 evidence, the pretest-posttest design is time-efficient, maximizes the number of trained HCPs and,  
4 in this case, it had no risk of contamination through the interactions between members of  
5 experimental and control groups. One limitation of the EDUCATE study is that we did not assess  
6 whether the participants completed all components of the training (the in-person component was  
7 mandatory). There is also the potential for testing bias, as the same PREMIS was administered at  
8 each assessment point; however, participants were never provided with the correct answers.  
9 Furthermore, because there are no established criteria for determining the MCID of the PREMIS,  
10 the results of this study are only clinically important. Additionally, there was notable loss-to-  
11 follow-up, with 79% of the participants completing the 12-month assessment upon which this  
12 analysis is based.  
13  
14  
15  
16  
17  
18  
19  
20  
21

## 22 **CONCLUSIONS**

23  
24 This study found that HCPs working in a fracture clinic setting who completed the EDUCATE  
25 program retain, and on some subscales, improve their IPV-related knowledge, beliefs, and  
26 opinions over the long-term. Although we cannot assume causality, these findings suggest that  
27 they are more prepared to address and assist victims of IPV who visit their clinics. Our findings,  
28 which are based on data collected from the PREMIS survey administered 12 months post-training,  
29 are consistent with those observed 3 months after receiving training. To further expand the reach  
30 of the program, the EDUCATE team has partnered with Canadian Orthopaedic Association to  
31 make the educational material available to HCPs across Canada. The program can be accessed at  
32 [www.IPVEDucate.com](http://www.IPVEDucate.com). Future research should be conducted to assess whether the EDUCATE  
33 program changes the behaviour of HCPs, and how this in turn may affect patient experiences.  
34  
35  
36  
37  
38  
39  
40  
41  
42  
43  
44  
45  
46  
47  
48  
49  
50  
51  
52  
53  
54  
55  
56  
57  
58  
59  
60

## References

1. WHO multi-country study on women's health and domestic violence against women. Geneva: World Health Organization; 2005. Available: [http://www.who.int/gender/violence/who\\_multicountry\\_study/Chapter7-Chapter8-Chapter9.pdf](http://www.who.int/gender/violence/who_multicountry_study/Chapter7-Chapter8-Chapter9.pdf). Accessed October 10, 2019.
2. Sprague S, Bhandari M, Della Rocca GJ, et al. Prevalence of abuse and intimate partner violence surgical evaluation (PRAISE) in orthopaedic fracture clinics: a multinational prevalence study. *Lancet* 2013;382:866-76.
3. Bhandari M, Sprague S, Tornetta P III, et al. (Mis)perceptions about intimate partner violence in women presenting for orthopaedic care: a survey of Canadian orthopaedic surgeons. *J Bone Joint Surg Am* 2008;90:1590-7.
4. Shearer HM, Bhandari M. Ontario chiropractors' knowledge, attitudes, and beliefs about intimate partner violence among their patients: a cross-sectional survey. *J Manipulative Physiol Ther* 2008;31:424-33.
5. Shearer HM, Forte ML, Dosanjh S, et al. Chiropractors' perceptions about intimate partner violence: a cross-sectional survey. *J Manipulative Physiol Ther* 2006;29:386-92.
6. Short LM, Alpert E, Harris JM Jr, et al. A tool for measuring physician readiness to manage intimate partner violence. *Am J Prev Med* 2006;30:173-80.
7. EDUCATE Investigators. Novel educational program improves readiness to manage intimate partner violence within the fracture clinic: a pretest-posttest study. *CMAJ Open*. 2018 Dec;6(4):E628–E636.
8. Schilling K, Applegate R. Best methods for evaluating educational impact: a comparison of the efficacy of commonly used measures of library instruction. *J Med Libr Assoc*. 2012 Oct;100(4):258-269.

- 1
  - 2
  - 3
  - 4
  - 5
  - 6
  - 7
  - 8
  - 9
  - 10
  - 11
  - 12
  - 13
  - 14
  - 15
  - 16
  - 17
  - 18
  - 19
  - 20
  - 21
  - 22
  - 23
  - 24
  - 25
  - 26
  - 27
  - 28
  - 29
  - 30
  - 31
  - 32
  - 33
  - 34
  - 35
  - 36
  - 37
  - 38
  - 39
  - 40
  - 41
  - 42
  - 43
  - 44
  - 45
  - 46
  - 47
  - 48
  - 49
  - 50
  - 51
  - 52
  - 53
  - 54
  - 55
  - 56
  - 57
  - 58
  - 59
  - 60
9. Norman GR, Sloan JA, Wyrwich KW. Interpretation of changes in health-related quality of life: the remarkable universality of half a standard deviation. *Med Care* 2003;41:582-92.

Confidential

**Table 1: Participant Characteristics**

|                                                   | <b>Participants<br/>N (%)<br/>N=109</b> |
|---------------------------------------------------|-----------------------------------------|
| <b>Demographics</b>                               |                                         |
| Age, mean (SD)                                    | 36.7 (10.9)                             |
| Sex, n (%)                                        |                                         |
| Female                                            | 36 (33.0)                               |
| Male                                              | 73 (67.0)                               |
| Race/ethnicity, n (%)                             |                                         |
| White/Caucasian                                   | 86 (78.9)                               |
| Black (African/Caribbean)                         | 1 (0.9)                                 |
| Hispanic/Latino                                   | 0 (0.0)                                 |
| South Asian                                       | 12 (11.0)                               |
| Native/Aboriginal                                 | 0 (0.0)                                 |
| Middle Eastern                                    | 2 (1.8)                                 |
| East Asian                                        | 6 (5.5)                                 |
| Other                                             | 2 (1.8)                                 |
| <b>Professional Characteristics</b>               |                                         |
| Health care profession, n (%)                     |                                         |
| Orthopaedic surgeon                               | 26 (23.9)                               |
| Physician                                         | 0 (0.0)                                 |
| Physician assistant                               | 4 (3.7)                                 |
| Nurse practitioner                                | 0 (0.0)                                 |
| Nurse                                             | 8 (7.3)                                 |
| Orthopaedic technician                            | 7 (6.4)                                 |
| Orthopaedic surgery resident                      | 45 (41.3)                               |
| Orthopaedic surgery fellow                        | 1 (0.9)                                 |
| Student                                           | 1 (0.9)                                 |
| Other                                             | 17 (15.6)                               |
| Years in Practice, median (IQR)                   | 4 (2-12)                                |
| Years at current fracture clinic, median (IQR)    | 3 (1.5-6)                               |
| Number of patients treated per year, median (IQR) | 1500 (725-3000)                         |
| <b>Previous IPV Training</b>                      |                                         |
| Hours of Previous IPV training, n (%)             |                                         |
| 0                                                 | 50 (45.9)                               |
| 1-5                                               | 52 (47.7)                               |
| 6-15                                              | 7 (6.4)                                 |
| More than 15                                      | 0 (0.0)                                 |
| Type of Previous IPV training, n (%)              |                                         |
| Watched a video                                   | 21 (19.3)                               |
| Attended a lecture/talk                           | 50 (45.9)                               |
| Attended skills-based training workshop           | 7 (6.4)                                 |
| Completed online training                         | 7 (6.4)                                 |
| Other                                             | 5 (4.6)                                 |

1  
2  
3  
4  
5  
6  
7  
8  
9  
10  
11  
12  
13  
14  
15  
16  
17  
18  
19  
20  
21  
22  
23  
24  
25  
26  
27  
28  
29  
30  
31  
32  
33  
34  
35  
36  
37  
38  
39  
40  
41  
42  
43  
44  
45  
46  
47  
48  
49  
50  
51  
52  
53  
54  
55  
56  
57  
58  
59  
60

|                                  |           |
|----------------------------------|-----------|
| Setting of Previous IPV training |           |
| Medical or professional school   | 28 (25.7) |
| Residency/placement/internship   | 13 (11.9) |
| Workplace                        | 14 (12.8) |
| Professional education           | 11 (10.1) |
| Other                            | 6 (5.5)   |

Confidential

**Table 2: PREMIS at 12 Months Post-Training**

|                       | Baseline Mean (SD) | 12-Months Mean (SD) | Multivariable linear regression model | Paired t-test            |
|-----------------------|--------------------|---------------------|---------------------------------------|--------------------------|
|                       |                    |                     | Mean Difference (95% CI)              | Mean Difference (95% CI) |
| Actual Knowledge      | 26.59 (4.92)       | 29.09 (4.66)        | 2.50 (1.69, 3.32)                     | 2.50 (1.40, 3.61)        |
| Perceived Preparation | 2.60 (1.08)        | 4.66 (1.15)         | 2.06 (1.88, 2.24)                     | 2.06 (1.83, 2.29)        |
| Perceived Knowledge   | 2.70 (1.12)        | 4.84 (1.05)         | 2.14 (1.96, 2.31)                     | 2.14 (1.91, 2.36)        |
|                       |                    |                     |                                       |                          |
| <i>Opinion Scales</i> |                    |                     |                                       |                          |
| Preparation           | 3.73 (1.25)        | 4.83 (0.90)         | 1.10 (0.94, 1.26)                     | 1.10 (0.82, 1.38)        |
| Legal Requirements    | 3.38 (1.52)        | 4.94 (1.16)         | 1.57 (1.36, 1.78)                     | 1.57 (1.27, 1.87)        |
| Workplace issues†     | 3.04 (0.95)        | 4.24 (0.88)         | 1.19 (1.04, 1.35)                     | 1.20 (1.01, 1.39)        |
| Self-Efficacy         | 3.56 (0.46)        | 4.12 (0.61)         | 0.56 (0.46, 0.67)                     | 0.56 (0.44, 0.69)        |
| Alcohol/drugs         | 4.22 (0.57)        | 4.34 (0.52)         | 0.11 (0.02, 0.21)                     | 0.11 (-0.02, 0.25)       |
| Victim Understanding  | 4.97 (0.70)        | 4.92 (0.70)         | -0.05 (-0.16, 0.07)                   | -0.05 (-0.18, 0.09)      |
| Practice Issues       | 5.81 (6.46)        | 11.94 (7.26)        | 6.12 (4.97, 7.27)                     | 6.12 (4.85, 7.40)        |

† N=108. One patient is missing all of the questions that are part of the Workplace Issues domain.



## Appendix 1: Authorship

**Members of the EDUCATE Investigators: *Writing committee:*** Paige Guyatt BSc (Cand.) (Co-Chair), Sheila Sprague PhD (Co-Chair), Taryn Scott MSW MSc, Diane Heels-Ansdell MSc, Paula McKay BSc, Diana Tikasz MSW, RSW, Prism S. Schneider MD PhD, Emil H. Schemitsch MD, Deborah L. Sietsema PhD, Mohit Bhandari MD, PhD, FRCSC. ***Study design and coordination:*** Sheila Sprague PhD, Taryn Scott MSW, Diana Tikasz MSW RSW, Paula McKay BSc, Lehana Thabane PhD, Diane Heels-Ansdell MSc, Patricia Solomon PhD, Deborah J. Cook MD MSc, Gerard P. Slobogean MD MPH, Patricia Schneider BSc; ***Participating sites:*** Prism S. Schneider MD PhD, Richard E. Buckley MD, Leah Kennedy BScN RN, Tanja Harrison MPA, Brad A. Petrisor MD MSc, Andrew Furey MD MSc, Kayla Cyr MD, Erin Baker MSc, Jeremy A. Hall MD MEd, Aaron Nauth MD MSc, Milena Vicente BScN RN, Debra L. Sietsema PhD, Emil H. Schemitsch MD, Melanie MacNevin BSc, Anthony Adili MD; ***Knowledge users:*** Douglas Thomson BSc, Trinity Wittman MSc, Mohit Bhandari MD PhD, Gina Agarwal MBBS PhD, Vanina Dal Bello-Haas PhD PT, Samir Faidi MD, Norma MacIntyre PhD, Angela Reitsma MSc RM, Andrew Worster MD MSc, Aparna Swaminathan MB BCh BAO, Ari Collerman MN, Nneka MacGregor LLB, Sarah Resendes Gilbert MPH

**Affiliations:** Departments of Surgery (Sprague, Petrisor, Bhandari, Faidi, McKay, Schneider), Health Research Methods, Evidence, and Impact (Sprague, Scott, Heels-Ansdell, Bhandari, Agarwal, Cook, Thabane, Worster), Family Medicine (Agarwal), Medicine (Cook, Worster) and Midwifery (Reitsma) and School of Rehabilitation Science (Dal Bello-Haas, MacIntyre, Solomon), McMaster University, Hamilton, Ont.; St. Joseph's Healthcare (Adili), Hamilton, Ont.; Department of Surgery (Prism Schneider, Buckley, Harrison, Kennedy), University of Calgary, Calgary, Alta.; Department of Surgery (Furey, Cyr, Baker), Memorial University of Newfoundland, St. John's, Nfld.; St. Michael's Hospital (Hall, Nauth, Vicente), Toronto, Ont.; Women's Centre for Social Justice (MacGregor), Toronto, Ont.; London Health Sciences Centre (MacNevin, Schemitsch), London, Ont.; Domestic Assault Review Team (Resendes Gilbert), Waterloo, Ont.; The CORE Institute (Sietsema), Phoenix, Ariz.; Department of Orthopaedics (Slobogean), University of Maryland School of Medicine, Baltimore, Md.; Department of Medicine (Swaminathan), University of Toronto, Toronto, Ont.; Canadian Orthopaedic Association (Thomson, Wittman), Montréal, Que.; Sexual Assault/Domestic Violence Care Centre (Tikasz), Hamilton Health Sciences (Collerman), McMaster University Medical Centre, Hamilton, Ont.

**Contributors:** Sheila Sprague and Mohit Bhandari conceived the study. Sheila Sprague, Taryn Scott, Diana Tikasz, Paula McKay, Lehana Thabane, Diane Heels-Ansdell, Patricia Solomon, Deborah J. Cook, Gerard P. Slobogean, Patricia Schneider, Mohit Bhandari, Douglas Thomson, Trinity Wittman, Gina Agarwal, Vanina Dal Bello-Haas, Samir Faidi, Norma MacIntyre, Angela Reitsma, Aparna Swaminathan, Andrew Worster, Ari Collerman, Norma MacIntyre, Sarah Resendes Gilbert and Nneka MacGregor contributed to the study design. Prism S. Schneider, Richard E. Buckley, Leah Kennedy, Tanja Harrison, Brad A. Petrisor, Taryn Scott, Andrew Furey, Kayla Cyr, Erin Baker, Jeremy A. Hall, Aaron Nauth, Milena Vicente, Debra L. Sietsema, Emil H. Schemitsch, Melanie MacNevin and Anthony Adili acquired the data. Diane Heels-Ansdell, Lehana Thabane, Sheila Sprague and Taryn Scott analyzed the data. Sheila Sprague, Taryn Scott, Diane Heels-Ansdell, Lehana Thabane and Mohit Bhandari interpreted the data. Paige Guyatt, Sheila Sprague, Taryn Scott and Diane Heels-Ansdell drafted the manuscript. All

1  
2  
3  
4  
5  
6  
7  
8  
9  
10  
11  
12  
13  
14  
15  
16  
17  
18  
19  
20  
21  
22  
23  
24  
25  
26  
27  
28  
29  
30  
31  
32  
33  
34  
35  
36  
37  
38  
39  
40  
41  
42  
43  
44  
45  
46  
47  
48  
49  
50  
51  
52  
53  
54  
55  
56  
57  
58  
59  
60

authors critically revised the manuscript, gave final approval of the version to be published and agreed to act as guarantors of the work.

Confidential
